# Supplementary material
Source: Research Square preprint supplement (doi:10.21203/rs.3.rs-9497558/v1)
Supplement: Supplementary file 1 [file 1705edcaa76742f932eb4eb3.docx]

**Author statement：**

Guangming Zhong, Jiaxiang Guo, Jing Xiao and Xueyan Lin performed the experiments. Xin Xu, Ke Zhang and Mingze Zhang wrote the manuscript. Xueying Hou did some adsorption experiments and revised the manuscript. Shihua Zhong, Yuli Fu and Mancai Xu were the supervisors.
