# Supplementary material
Source: Research Square preprint supplement (doi:10.21203/rs.3.rs-9497558/v1)
Supplement: Supplementary file 2 [file 70fde4334814a2dbbb72f034.docx]

**Declaration of interests**

The authors declare that they have no known competing financial interests or personal relationships that could have appeared to influence the work reported in this paper.
