# Supplementary material
Source: Research Square preprint supplement (doi:10.21203/rs.3.rs-9497558/v1)
Supplement: Supplementary file 3 [file 94e085d3e2902d779e458bac.docx]

**Highlights**

1. A novel N-methylimidazolium-based macroporous resin (PS-R-OH) was synthesized via SN2 reaction.

2. PS-R-OH showed high adsorption capacities for benzoic acid, naphthol, and binaphthol at 298 K.

3. The resin achieved rapid equilibrium, complete removal at 100 mg/L, and 90% performance after 8 cycles.

4. Hydrophobic interactions, desolvation, π-π interactions, and hydrogen bonding governed the adsorption process.
