# Supplementary material
Source: Research Square preprint supplement (doi:10.21203/rs.3.rs-9497558/v1)
Supplement: Supplementary file 4 [file cfe86e147350f9e98f88a058.docx]

*Supporting information*

**Preparation of N-methylimidazolium-based Strongly Basic Macroporous Resins and Their Adsorptions Performance towards Aromatic Acids**

Guangming Zhong a, b, Jiaxiang Guo a, Jing Xiao a, Xueyan Lin c, Xin Xu c, Ke Zhang c, Mingze Zhang c, Xueying Hou a, Yuli Fu a, c, *, Mancai Xu a, *, Shihua Zhong a, *

*a College of Chemistry and Chemical Engineering, Open Foundation of National & Local Joint Engineering Laboratory for New Petro-chemical Materials and Fine Utilization of Resources, Key Laboratory of the Assembly and Application of Organic Functional Molecules of Hunan Province, Hunan Normal University, Changsha 410081, China*

*b Yiyang Heshan District Emergency Management Bureau, Yiyang 413000, China*

*c School of Materials Science and Engineering, Tianjin University of Technology, Tianjin 300384, China*

__________

Corresponding Authors. * Yuli Fu, E-mail: yulifu_tut@163.com; Mancai Xu, E-mail: romann@hunnu.edu.cn; Shihua Zhong, E-mail: zhongshihua@hunnu.edu.cn

## **1. Experimental section**

## **1.1 Materials**

Macroporous chloromethylated polystyrene (PS) was supplied by Jafron Biomedical Co., Ltd. (Guangdong, China), its *S*BET was 84.78 m2/g, total pore volume (*V*total) was 0.60 cm3/g, average pore size was 27.18 nm, and the chlorine content was 4.99 mmol/g. N-methylimidazole, isopropanol, N,N-dimethylformamide (DMF), 95% ethanol, phenolphthalein, nitrobenzene, silver nitrate (AgNO3), Ammonium ferric sulfate (NH4Fe(SO4)2), Ammonium thiocyanate (NH4SCN), sodium hydroxide (NaOH), hydrochloric acid (HCl), tetrabutylammonium bromide, naphthol, binaphthol, benzoic acid purchased from Sinopharm Chemical Industry Co., Ltd. (Shanghai, China), were analytical agents and used without further purification.

## **1.2 Synthesis of PS-R-Cl, PS-R-OH, and** PS-R-NO₃

20 g PS was swelled in 200 mL DMF 8 h, and 11.68 g 1-Methylimidazole were quickly added and stirred for 24 h at 383 K. After the reaction, most of the DMF and N-methylimidazole were removed by washing with deionized water and anhydrous ethanol, respectively. Subsequently, PS-R-Cl was obtained by Soxhlet extraction for 8 h. PS-R-Cl was then placed in a chromatography column, washed with 0.5 mol/L NaOH solution, followed by deionized water until neutral, yielding the PS-R-OH, which was stored in a sealed bag under wet conditions. PS-R-OH was placed into a chromatography column, washed with 0.5 mol/L HNO₃, and then rinsed with deionized water until neutral to obtain PS-R-NO₃, which was stored in a wet state.

## **1.3 Characterization**

The Fourier transform infrared spectroscopy (FT-IR) of polymers was subjected to measurement by KBr disk method using Nicolet 510P Fourier transform infrared spectroscopy (Thermo Nicolet Corporation, USA) in the range of 500-4000 cm−1. Its resolution is 1.0 cm-1. The pore structure of the polymer was determined by a nitrogen adsorption-desorption isotherm (77 K) using a Micromeritics ASAP 2020 Surface Area and Porosity Analyzer (Micromeritics Instrument Corporation, USA). Prior to measurement, a degassing process was carried out for 300 min at a nitrogen purge and degassing pretreatment temperature of 363 K. The BET surface area (*S*BET) was calculated by the BET model including *P/P*0=0.05-0.30, and the total pore volume was calculated (*V*total) at *P/P*0=0.99. The pore size distribution (PSD) was calculated by the non-local density functional theory (NLDFT) model. The X-ray photoelectron spectroscopy (XPS) of the samples was investigated on a Thermo ESCALAB 250Xi (ThermoFisher-VG Scientific, China) spectrometer with an Al K-alpha source. The chlorine content of the polymers was measured according to the Volhard method. The concentration of naphthol, binaphthol, benzoic acid in aqueous solution and isopropanol solutions was determined using a UV-2450 spectrophotometer.

## **1.4 Adsorption isotherm and adsorption kinetics**

0.1 g wet resins after absorbing the surface moisture with filter paper and put it into a dry 50 mL erlenmeyer flask with 25 mL adsorbate naphthol solution with its initial concentration at 100, 200, 300, 400, and 500 mg/L, respectively. Placed these flasks in a constant temperature oscillator at a certain temperature (298, 308 and 318 K), and shaken at 150 r/min for 24 h. The equilibrium concentration of naphthol aqueous solution was measured at the maximum adsorption wavelength (naphthol: *λ*max = 273 nm, binaphthol: *λ*max =285 nm, benzoic acid: *λ*max = 225 nm), then calculated the equilibrium adsorption capacity of the polymers on the adsorbate *q*e (mg/g) according to the equation.

*q*e *=* (*C*0*-C*e)*V*/(*W*(1-*x*)). (*Eq.1*)

Where *q*e is the equilibrium capacity (mg/g), *C*e and *C*0 are the equilibrium and initial concentration (mg/L), *V* is the solution volume (L), *W* and *x* (%) were the mass of wet polymers (g) and water content of the polymers, respectively. The adsorption isotherms of SA for each polymer at a certain temperature were plotted with *C*e as the abscissa and *q*e as the ordinate. The experimental process for the other three adsorbents is the same as above.

The operation of kinetic adsorption is as follows. 0.3 g wet resins were accurately weighed and added to a 250 mL erlenmeyer flask and pipette 100 mL of adsorbate solutions with its initial concentration at 1000 mg/L. Placed these flasks in a constant temperature oscillator at a 298 K, and shaken at 150 r/min. Collected the solution at different time intervals, and measured the absorbance after diluting. Recorded the concentration and time (t) of sampling, and stopped sampling when the concentration does not change. Recorded the time when the adsorption reaches equilibrium, then calculated the *q*t (mg/g).

## **1.5 Repeated adsorption and desorption experiments**

About 0.05 g wet resin was added into a 50 mL erlenmeyer flask, 25 mL adsorbents solution with an initial concentration of 500 mg/L was added. Placed the flask in a constant temperature oscillator at 298 K, and shaken at 150 r/min for 24 h. The equilibrium concentration of adsorbents solution was measured at the maximum adsorption wavelength, and calculate the adsorption amount according to the formula *Eq (1)*. After the adsorbed resin was desorbed with 100% (v/v) ethanol, washed with water and filtered. The above adsorption operation was repeated eight times.

## **2. Characterization Supplementary Figure**

Fig. S1 Adsorption of binaphthol on the PS-R-OH at 298, 308 and 318 K

Fig. S2 Adsorption of benzoic acid on the PS-R-OH at 298, 308 and 318 K

Fig. S3 Adsorption of binaphthol on the PS-R-OH at 298, 308 and 318 K

Fig. S4 Adsorption of benzoic acid on the PS-R-OH at 298, 308 and 318 K

Fig. S5 Adsorption isotherms of benzoic acid in isopropyl alcohol

## **3. Characterization Supplementary Table**

Table S1 Correlated parameters of the equilibrium data for the naphthol adsorption on PS-R-OH according to the Langmuir and Freundlich model

| Temperature | Langmuir model | | | Freundlich model | | |
| --- | --- | --- | --- | --- | --- | --- |
| KL /(L/mg) | qm /(mg/g) | R2 | KF /(mg/g)((L/mg)1/n) | n | R2 |
| 298K | 0.0030 | 824.10 | 0.9852 | 12.89 | 1.69 | 0.9945 |
| 308K | 0.0037 | 826.89 | 0.9952 | 17.12 | 1.78 | 0.9992 |
| 318K | 0.0044 | 834.48 | 0.9951 | 20.98 | 1.84 | 0.9987 |

Table S2 Correlated parameters of the equilibrium data for the binaphthol adsorption on PS-R-OH according to the Langmuir and Freundlich model

| Temperature | Langmuir model | | | Freundlich model | | |
| --- | --- | --- | --- | --- | --- | --- |
| KL /(L/mg) | qm /(mg/g) | R2 | KF /(mg/g)((L/mg)1/n) | n | R2 |
| 298K | 0.0332 | 506.13 | 0.9964 | 170.13 | 5.84 | 0.9996 |
| 308K | 0.0412 | 541.59 | 0.9980 | 190.48 | 5.94 | 0.9949 |
| 318K | 0.1166 | 538.83 | 0.9939 | 260.77 | 8.03 | 0.9952 |

Table S3 Correlated parameters of the equilibrium data for the benzoic acid adsorption on PS-R-OH according to the Langmuir and Freundlich model

| Temperature | Langmuir model | | | Freundlich model | | |
| --- | --- | --- | --- | --- | --- | --- |
| KL /(L/mg) | qm /(mg/g) | R2 | KF /(mg/g)((L/mg)1/n) | n | R2 |
| 298K | 0.5100 | 367.57 | 0.9575 | 173.19 | 7.62 | 0.9988 |
| 308K | 0.3447 | 360.73 | 0.9564 | 162.43 | 7.26 | 0.9989 |
| 318K | 0.2405 | 354.36 | 0.9552 | 149.05 | 6.80 | 0.9980 |

Table S4 The adsorption thermodynamic parameters of naphthol on PS-R-OH

| q  (mg/g) | ΔH  (kJ/mol) | ΔG (kJ/mol) | | | ΔS (J/(mol·K)) | | |
| --- | --- | --- | --- | --- | --- | --- | --- |
| 298K | 308K | 318K | 298K | 308K | 318K |
| 100 | 23.27 | -4.02 | -4.57 | -4.88 | 92.18 | 90.39 | 88.52 |
| 150 | 20.87 | -4.02 | -4.57 | -4.88 | 84.12 | 82.59 | 80.96 |
| 200 | 19.16 | -4.02 | -4.57 | -4.88 | 78.40 | 77.05 | 75.60 |
| 250 | 17.84 | -4.02 | -4.57 | -4.88 | 73.96 | 72.76 | 71.44 |

Table S5 The adsorption thermodynamic parameters of binaphthol on PS-R-OH

| q  (mg/g) | ΔH  (kJ/mol) | ΔG (kJ/mol) | | | ΔS (J/(mol·K)) | | |
| --- | --- | --- | --- | --- | --- | --- | --- |
| 298K | 308K | 318K | 298K | 308K | 318K |
| 300 | 85.70 | -14.47 | -15.22 | -21.23 | 336.13 | 327.66 | 336.26 |
| 325 | 78.86 | -14.47 | -15.22 | -21.23 | 313.18 | 305.46 | 314.76 |
| 350 | 72.53 | -14.47 | -15.22 | -21.23 | 291.94 | 284.90 | 294.85 |
| 375 | 66.64 | -14.47 | -15.22 | -21.23 | 272.16 | 265.76 | 276.31 |

Table S6 The adsorption thermodynamic parameters of benzoic acid on PS-R-OH

| q  (mg/g) | ΔH  (kJ/mol) | ΔG (kJ/mol) | | | ΔS (J/(mol·K)) | | |
| --- | --- | --- | --- | --- | --- | --- | --- |
| 298K | 308K | 318K | 298K | 308K | 318K |
| 210 | -33.95 | -18.88 | -18.59 | -17.98 | -50.59 | -49.87 | -50.23 |
| 240 | -29.65 | -18.88 | -18.59 | -17.98 | -36.16 | -35.91 | -36.71 |
| 270 | -25.86 | -18.88 | -18.59 | -17.98 | -23.43 | -23.59 | -24.78 |
| 300 | -22.47 | -18.88 | -18.59 | -17.98 | -12.04 | -12.58 | -14.11 |

Table S7 Correlated parameters of the equilibrium data for the adsorption of naphthol, binaphthol and benzoic acid onto PS-R-OH from isopropanol, according to the Langmuir and Freundlich models

| Adsorbate | Langmuir model | | | Freundlich model | | |
| --- | --- | --- | --- | --- | --- | --- |
| KL /(L/mg) | qm /(mg/g) | R2 | KF /(mg/g)((L/mg)1/n) | n | R2 |
| naphthol | 0.00567 | 122.93 | 0.9697 | 12.97 | 3.23 | 0.9870 |
| binaphthol | 0.00572 | 476.76 | 0.9892 | 22.06 | 2.21 | 0.9993 |
| benzoic acid | 0.01523 | 262.55 | 0.9768 | 43.63 | 3.74 | 0.9923 |

Table S8 Fitted parameters for the kinetics adsorption data on the PS-R-OH by pseudo-first-order rate and pseudo-second-order rate equations at 298 K

| Adsorbate | Pseudo-first-order | | Pseudo-second-order | |
| --- | --- | --- | --- | --- |
| k1 (min-1) | R2 | k2 (g/(mg·min)) | R2 |
| naphthol | 1.51×10-2 | 0.9634 | 3.70×10-5 | 0.9914 |
| binaphthol | 1.30×10-2 | 0.9735 | 4.30×10-5 | 0.9966 |
| benzoic acid | 8.47×10-2 | 0.9848 | 3.62×10-4 | 0.9952 |

**References**

[1] Meng X, Liu Y, Wang S, Ye Y, Song X, Liang Z (2022) Post-crosslinking of conjugated microporous polymers using vinyl polyhedral oligomeric silsesquioxane for enhancing surface areas and organic micropollutants removal performance from water. Journal of Colloid and Interface Science 615: 697-706

[2] Cao Y, Wang Y, Zhou F, Huang J, Xu M (2022) Acylamino-functionalized hyper crosslinked polymers for efficient adsorption removal of phenol in aqueous solution. Separation and Purification Technology 303: 122229

[3] Zhang F, Zhang S, Chen L, Liu Z, Qin J (2021) Utilization of bark waste of Acacia mangium: The preparation of activated carbon and adsorption of phenolic wastewater. Ind Crops Prod 160: 113157

[4] Ramesh H, Bhuyan A (2024) The food and pharmaceutical additive benzoic acid induces amyloid fibrillation of an intrinsically disordered protein. Biophysical Chemistry 306: 107172

[5] Naguib D, Badawy N (2020) Phenols and polyphenols: promise and peril to human health. Journal of Environmental Chemical Engineering 8: 103592

[6] Yang Y, Ali A, Su J, Chang Q, Xu L, Su L, Qi Z (2022) Phenol and 17*β*-estradiol removal by Zoogloea sp. MFQ7 and in-situ generated biogenic manganese oxides: Performance, kinetics and mechanism. Journal of Hazardous Materials 429: 128281

[7] Sun Y, Gu Y, Yang J (2022) Adsorption of N-heterocyclic compounds from aqueous solutions by sulfonic acid-functionalized hypercrosslinked resins in batch experiments. Chemical Engineering Journal 428: 131163

[8] Peng Q, Zhao H, Wang R, Cao X, Liu H, Liu Q (2022) Ferrocene-based hypercrosslinked polymers derived from phenolic polycondensation with unexpected H2 adsorption capacity. Materials Today Chemistry 24: 100854

[9] Zhang H, Li Y, Cheng B, Ding C, Zhang Y (2020) Synthesis of a starch-based sulfonic ion exchange resin and adsorption of dyestuffs to the resin. International Journal of Biological Macromolecules 161: 561-572
